# Supplementary material for: Novel Insight in Idiopathic Normal Pressure Hydrocephalus (iNPH) Biomarker Discovery in CSF
Source: MDPI journal article supplement (doi:10.3390/ijms22158034), 2021-07-27
Supplement: s1 [file s1]

# Supplementary Figures

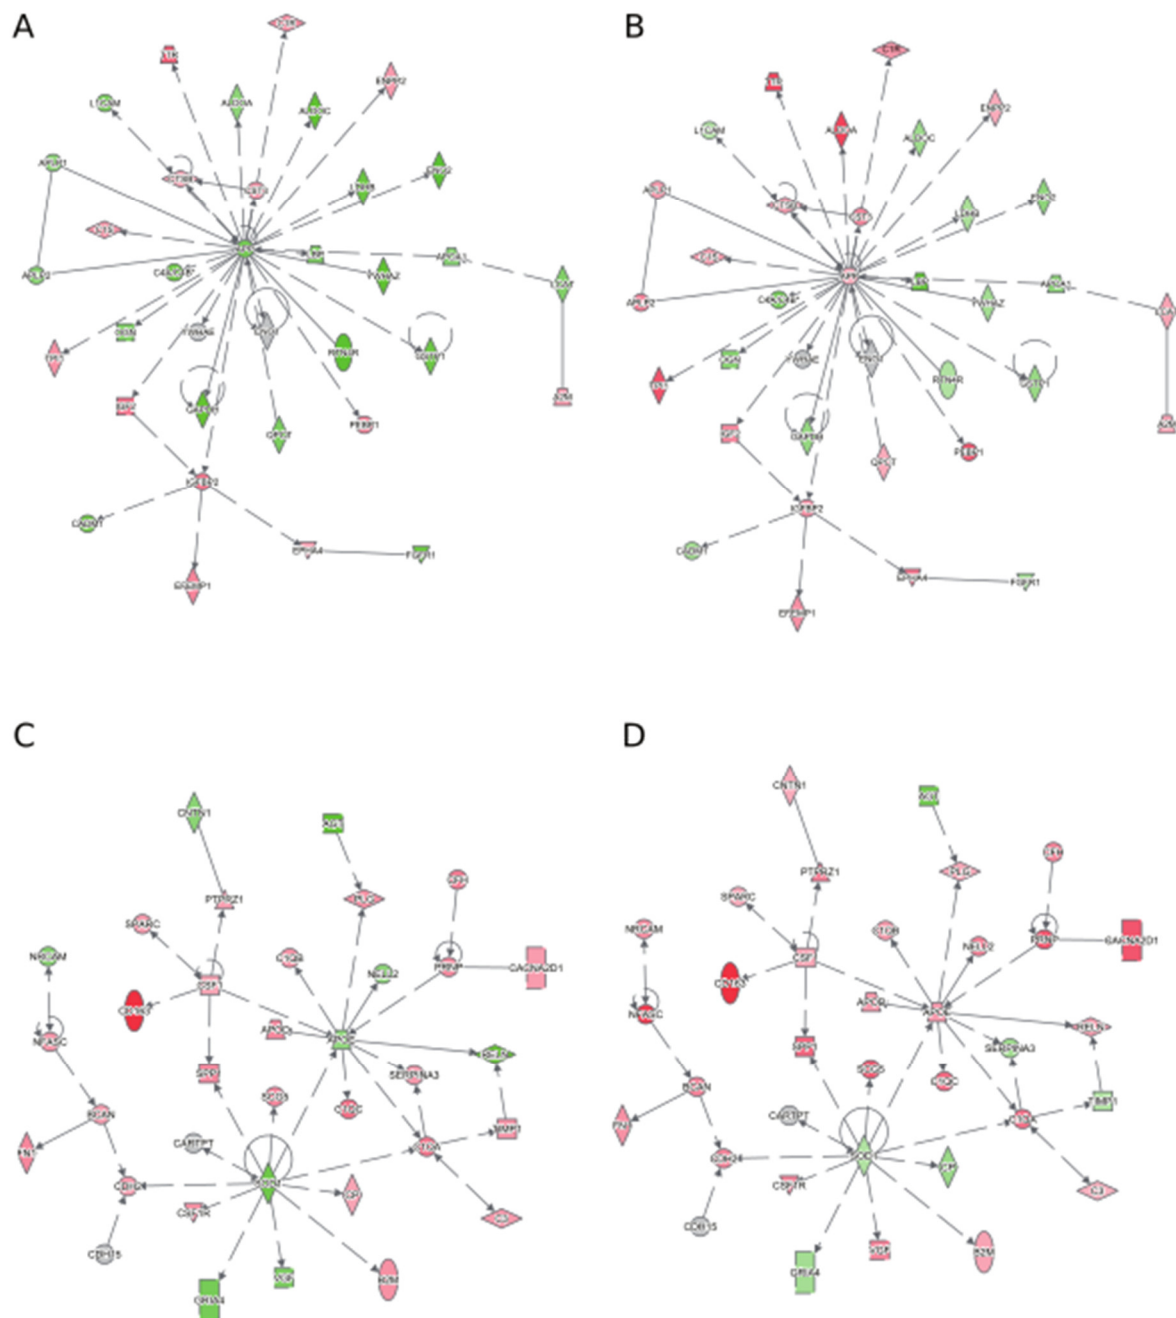

**Figure S1.** Ingenuity Pathway Analysis networks. The first network (A) iNPH vs controls; (B) AD vs controls, grouped 35 proteins mainly involved in neurological disease, scoring 56; the second (C) iNPH vs controls; (D) AD vs controls grouped 35 proteins involved in metabolic disease, scoring 56.

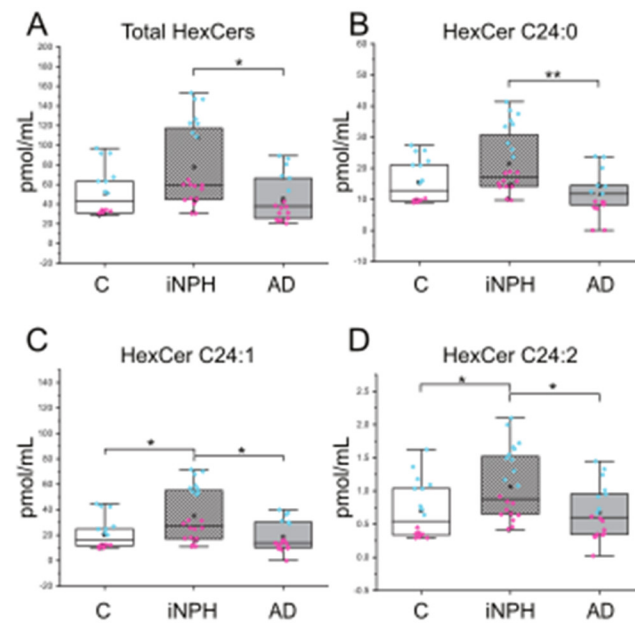

**Figure S2.** Sex distribution in box plots of CSF hexosylceramide species. Men are shown as blue circles whereas women are shown as pink circles. Data were analyzed using Kruskal-Wallis ANOVA, followed by Dunn's post hoc test for multiple comparisons. \*  $p$ -value < 0.05, \*\*  $p$ -value < 0.01, \*\*\*  $p$ -value < 0.001.
